# Supplementary material for: Shikonin Inhibits Inflammatory Response in Rheumatoid Arthritis Synovial Fibroblasts via lncRNA-NR024118
Source: Hindawi journal article supplement (doi:10.1155/2015/631737), 2015-01-01
Supplement: f1 [file 631737.f1.zip]

Archive with 2 entries (1 files):
- 631737.f1/
- 631737.f1/631737.f1.jpg
