# Supplementary figures and images for: Shikonin Inhibits Inflammatory Response in Rheumatoid Arthritis Synovial Fibroblasts via lncRNA-NR024118
Source: Hindawi journal article supplement (doi:10.1155/2015/631737), 2015-01-01

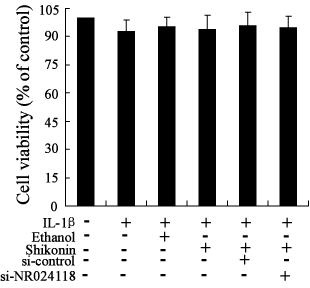

Supplement: f1 [file 631737.f1.zip › 631737.f1/631737.f1.jpg]
